# Supplementary material for: Selective recognition of atropine in biological fluids and leaves ofDatura stramoniumemploying a carbon nanotube–chitosan film based biosensor
Source: Royal Society of Chemistry journal article supplement (doi:10.1039/c8nj01312h), 2018-01-01
Supplement: c8nj01312h1.pdf [file c8nj01312h1.pdf]

## Supplementary Information

### **Selective recognition of atropine in biological fluids and leaves of *Datura stramonium* employing carbon nanotubes – chitosan film based biosensor**

Suyash Mane, Rushda Narmawala and Sanghamitra Chatterjee\*

*Department of Chemistry, Institute of Chemical Technology, Matunga, Mumbai 400019, India*

---

\*Corresponding author. Tel.: +91-22-33611144

Email address: sk.chatterjee@ictmumbai.edu.in (S. Chatterjee)

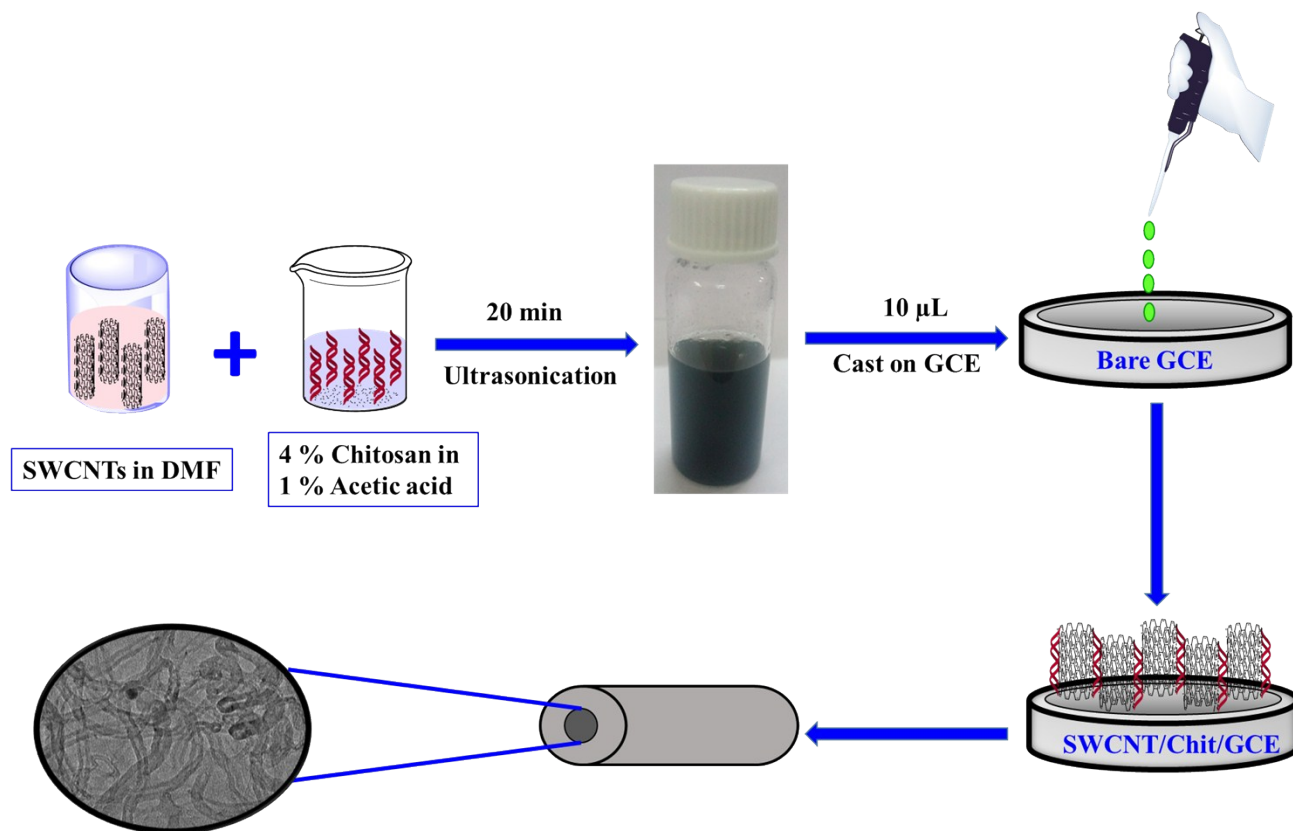

**Scheme S-1** Synthetic route of the developed biosensor.

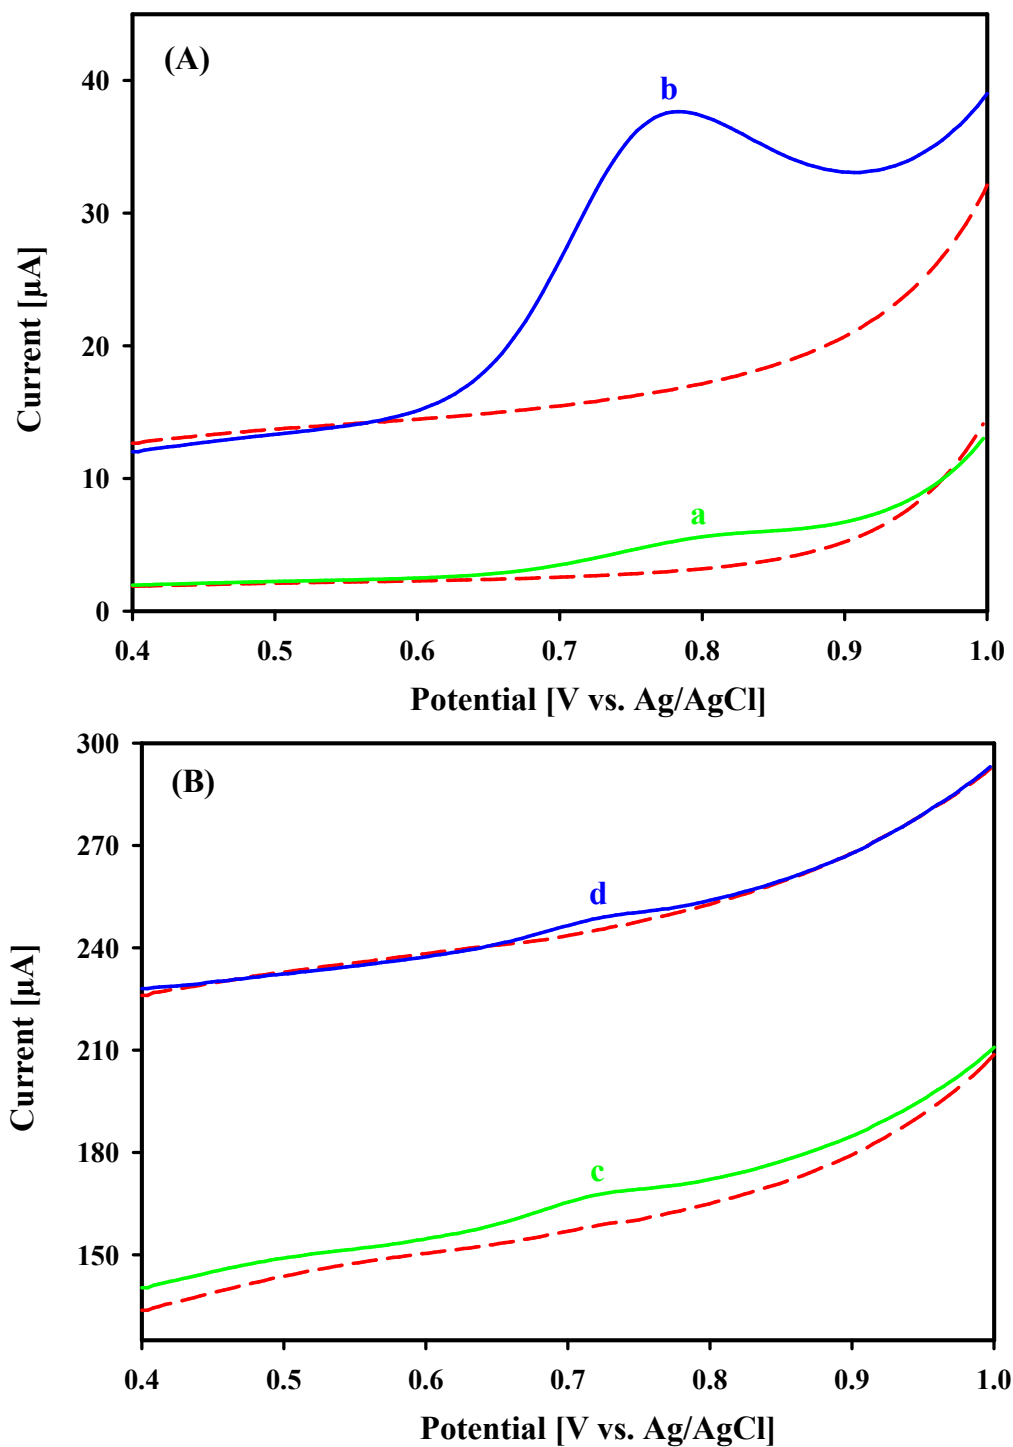

**Fig. S-1** Voltammetric response obtained for 100  $\mu\text{M}$  atropine in PBS of pH 10.0 with (A) (a) 0.25, (b) 0.5; (B) (c) 1.0 and (d) 2.0 mg mL<sup>-1</sup> suspension of SWCNTs in 4% chitosan coated on GCE.

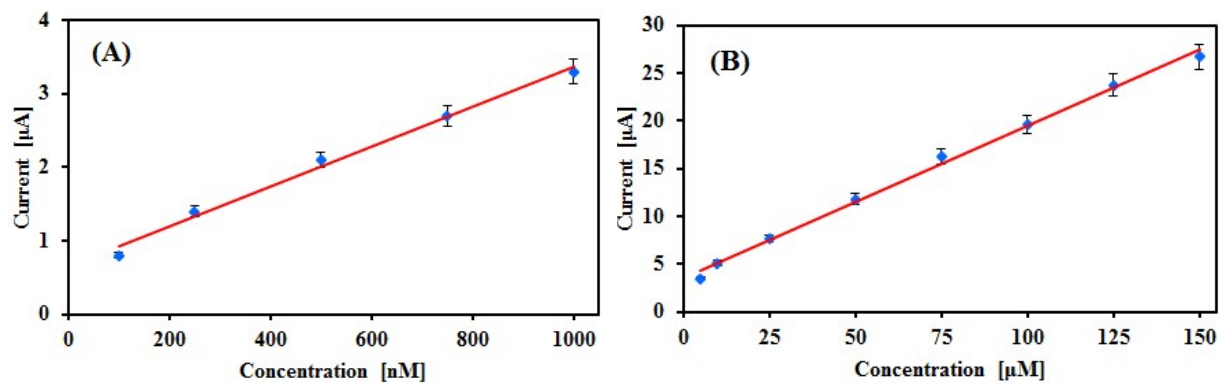

**Fig. S-2** Linear calibration plot of atropine in the range (A) 100 to 1000 nM and (B) 5 to 150  $\mu\text{M}$  observed at SWCNT/Chit/GCE.

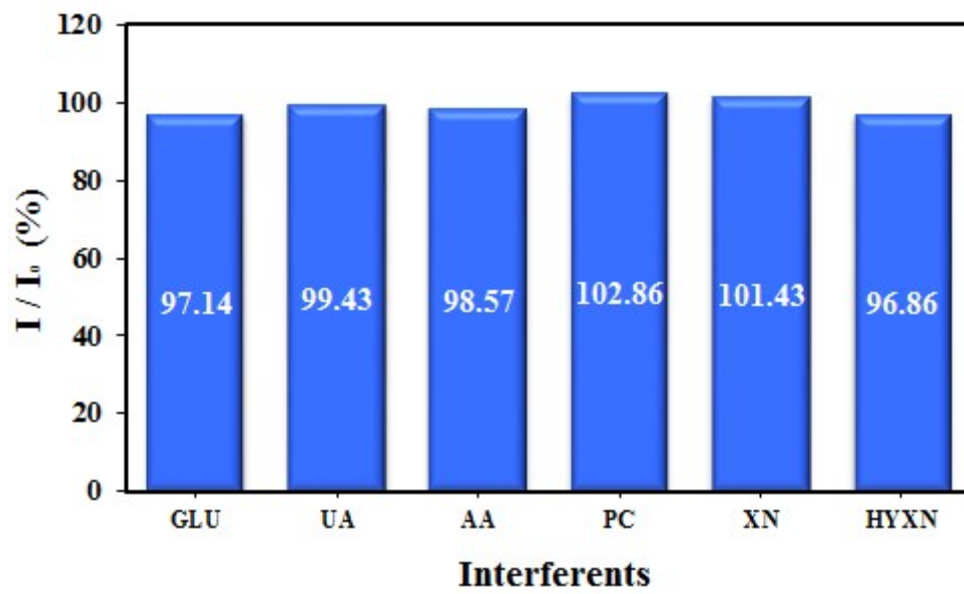

**Fig. S-3** Effect of interferents of 500  $\mu\text{M}$  each of glucose, uric acid, ascorbic acid, paracetamol, xanthine and hypoxanthine on 5  $\mu\text{M}$  of atropine at SWCNT/Chit/GCE.

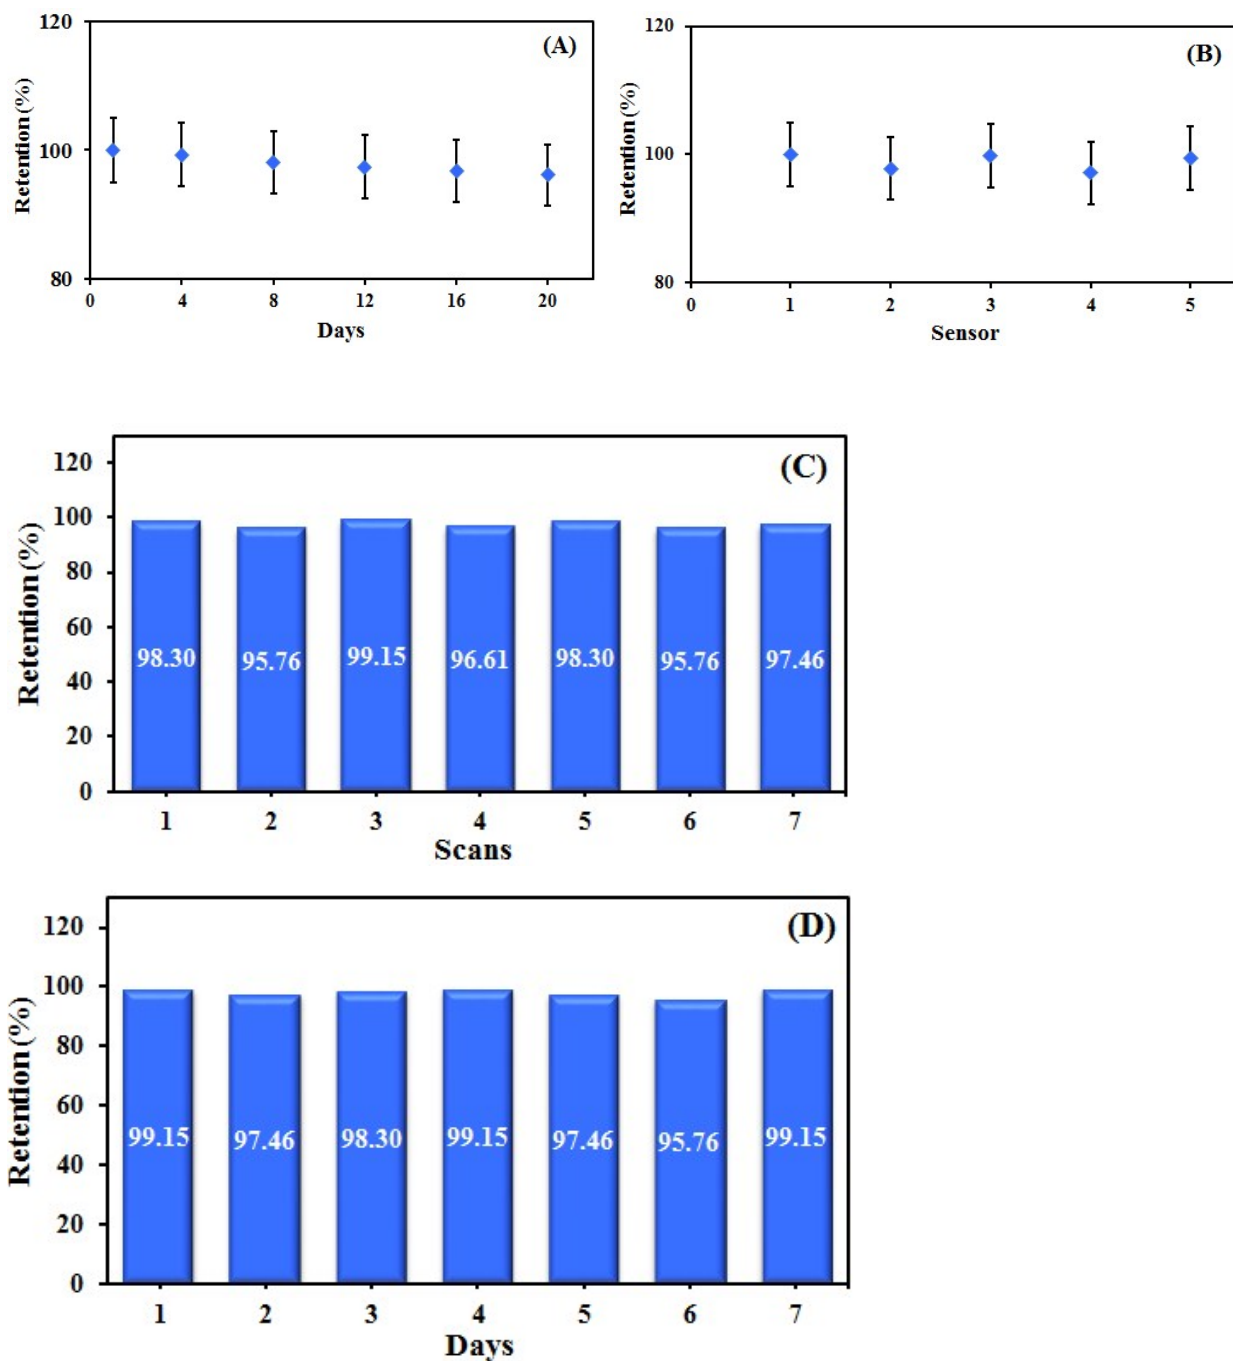

**Fig. S-4** (A) Stability and (B) Sensor reproducibility of the SWCNT/Chit/GCE for 50  $\mu\text{M}$  atropine in PBS of pH 10.0. (C) Intra day and (D) Inter day reproducibility of the SWCNT/Chit/GCE for 50  $\mu\text{M}$  atropine in PBS of pH 10.0.

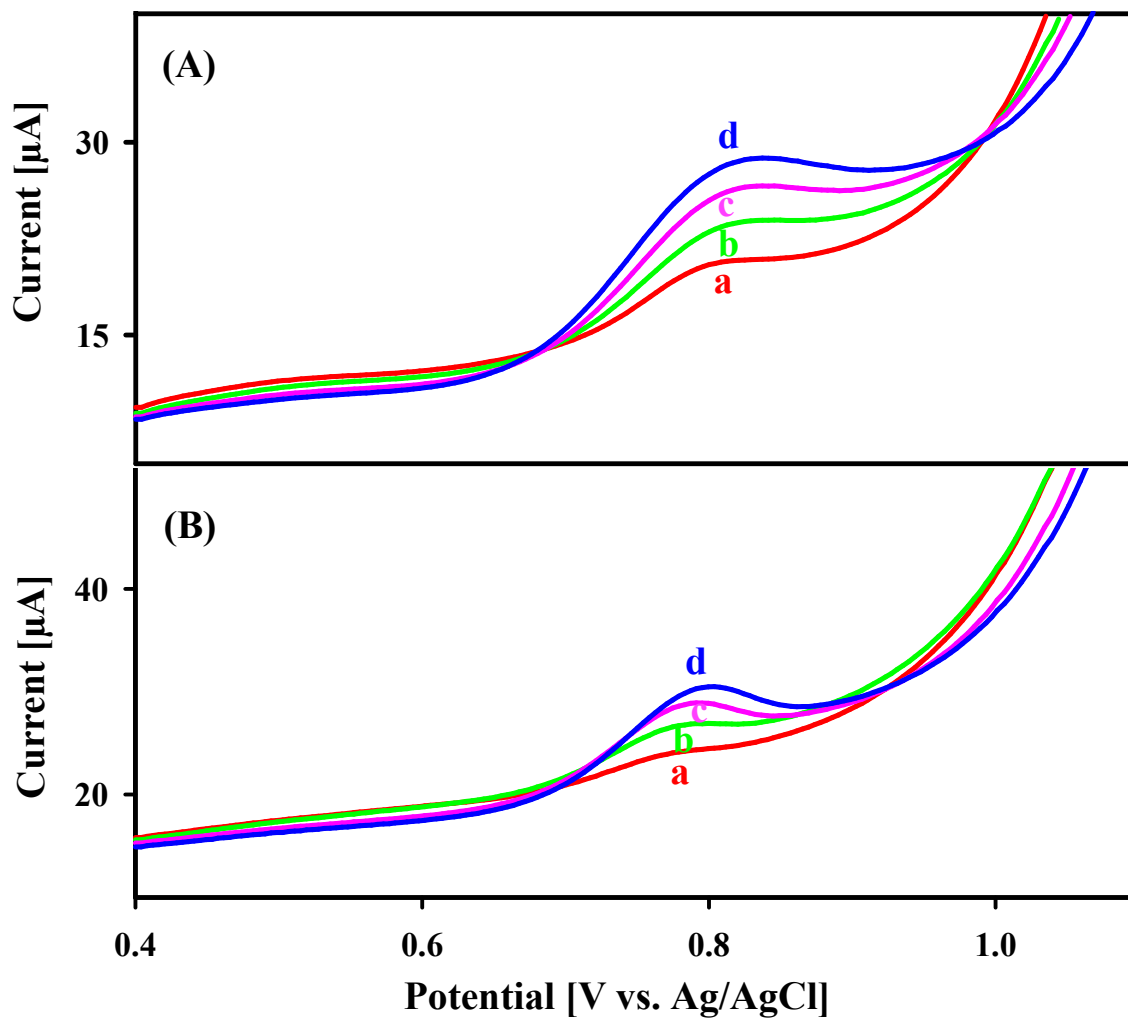

**Fig. S-5 (A)** Voltammetric response obtained at SWCNT/Chit/GCE for leaves of *Datura stramonium* sample 1 (a) before spiking and after (b) 15, (c) 30 and (d) 45  $\mu\text{M}$  spiking of atropine.

**(B)** Voltammetric response obtained at SWCNT/Chit/GCE for pharmaceutical sample 1 (a) before spiking and after (b) 10, (c) 20 and (d) 30  $\mu\text{M}$  spiking of atropine.

**Table S-1** Concentration of atropine in human urine and human serum samples at SWCNT/Chit/GCE at pH 10.0.

|                    | <b>Spiked (<math>\mu\text{M}</math>)</b> | <b>Detected (<math>\mu\text{M}</math>)</b> | <b>Recovery (%)</b> |
|--------------------|------------------------------------------|--------------------------------------------|---------------------|
| <b>Human Urine</b> |                                          |                                            |                     |
| <b>Sample 1</b>    | 0.00                                     | -----                                      | -----               |
|                    | 20.00                                    | 19.63                                      | 98.15               |
|                    | 40.00                                    | 39.06                                      | 97.65               |
|                    | 60.00                                    | 59.12                                      | 98.53               |
| <b>Sample 2</b>    | 0.00                                     | -----                                      | -----               |
|                    | 20.00                                    | 19.31                                      | 96.55               |
|                    | 40.00                                    | 40.75                                      | 101.88              |
|                    | 60.00                                    | 57.87                                      | 96.45               |
| <b>Human Serum</b> |                                          |                                            |                     |
| <b>Sample 1</b>    | 0.00                                     | -----                                      | -----               |
|                    | 30.00                                    | 30.60                                      | 102.00              |
|                    | 60.00                                    | 58.81                                      | 98.02               |
|                    | 90.00                                    | 87.02                                      | 96.69               |
| <b>Sample 2</b>    | 0.00                                     | -----                                      | -----               |
|                    | 30.00                                    | 29.97                                      | 99.90               |
|                    | 60.00                                    | 60.56                                      | 100.93              |
|                    | 90.00                                    | 87.65                                      | 97.39               |



**Table S-2** Comparison of the SWCNT/Chit/GCE with the reported sensors for the electrochemical determination of atropine.

| Technique | Sensor Used                                                                     | Analytical Range (M)                        | Limit of Detection (M) | Sensitivity ( $\mu\text{A}/\mu\text{M}$ ) | Reference |
|-----------|---------------------------------------------------------------------------------|---------------------------------------------|------------------------|-------------------------------------------|-----------|
| DPV       | $\text{Co}_3\text{O}_4$ -reduced graphene oxide modified carbon paste electrode | $0.1 \times 10^{-6}$ – $3.2 \times 10^{-6}$ | $0.03 \times 10^{-6}$  | 2.59                                      | 28        |
| LSV       | Poly (3, 4-ethylene-dioxythiophene) film modified Pt electrode                  | $0.1 \times 10^{-6}$ – $100 \times 10^{-6}$ | $27 \times 10^{-9}$    | -----                                     | 31        |
| CV        | Screen printed graphite electrode                                               | $5 \times 10^{-6}$ – $50 \times 10^{-6}$    | $3.9 \times 10^{-6}$   | 0.01                                      | 13        |
| DPV       | Modified pencil graphite electrode                                              | $0.6 \times 10^{-6}$ – $600 \times 10^{-6}$ | $30 \times 10^{-9}$    | 0.20                                      | 29        |
| SWV       | SWCNT/Chit/GCE                                                                  | $100 \times 10^{-9}$ – $150 \times 10^{-6}$ | $16.5 \times 10^{-9}$  | 2.70                                      | This work |
